# Supplementary material for: Retina Organoid Transplants Develop Photoreceptors and Improve Visual Function in RCS Rats With RPE Dysfunction
Source: PubMed Central journal article supplement (PMC7509771; doi:10.1167/iovs.61.11.34), 2020-09-18
Supplement: iovs-61-11-34_s002.pdf [file iovs-61-11-34_s002.pdf]

**SC121 (human) Synaptophysin Recov. (PRs + cone BPs) DAPI**

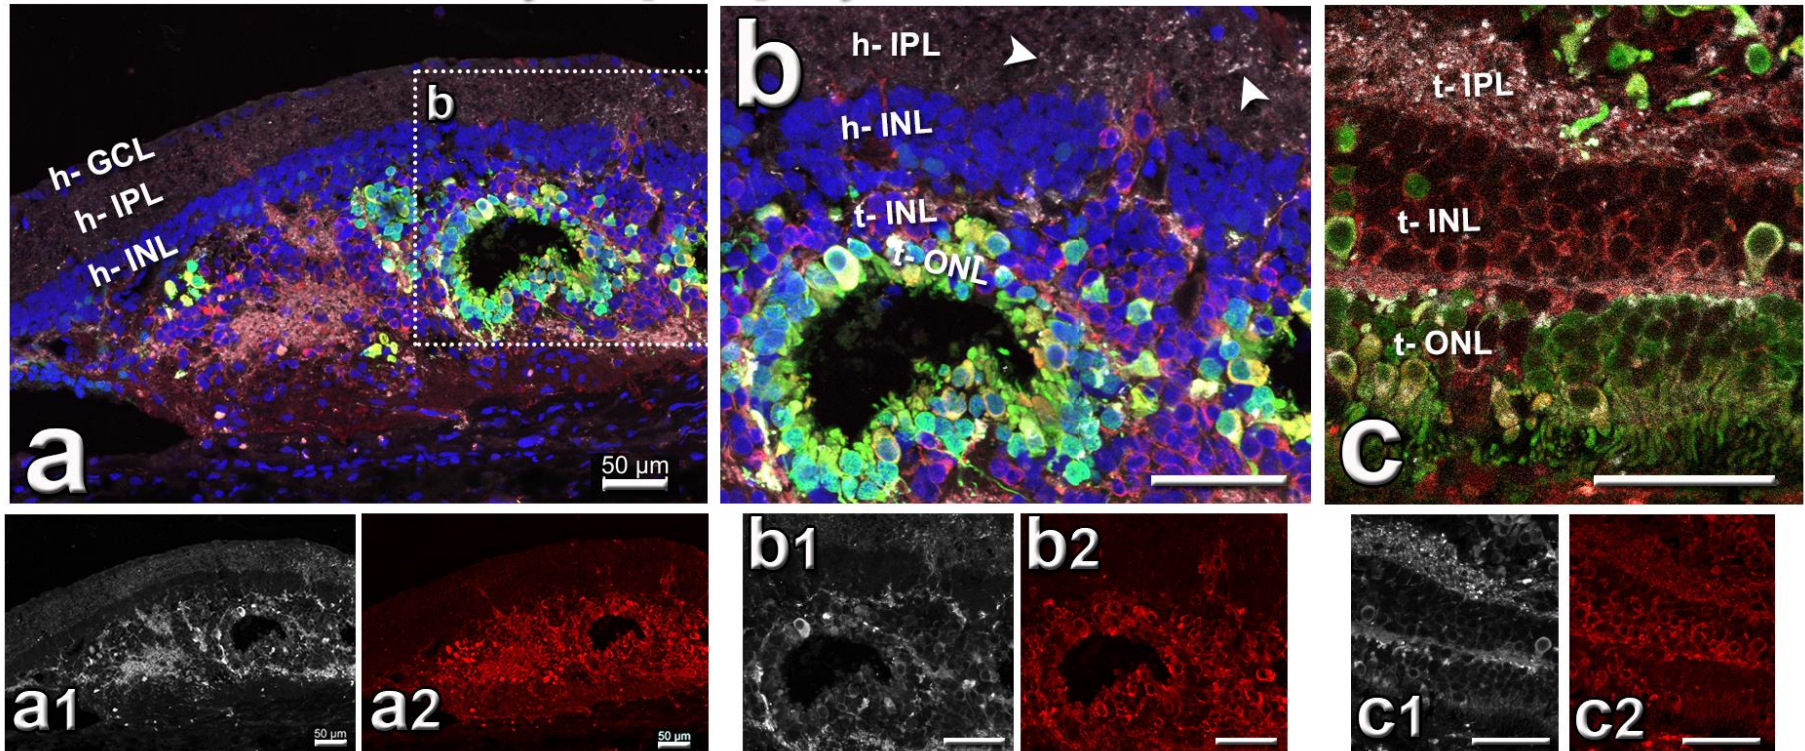

**Supplemental Figure S2** (refers to Figure 7): **Triple staining for synaptophysin in combination with donor label SC121 and Recoverin**

**(a-c):** Combination of SC121 (human cytoplasm, red), synaptophysin (synapses, white), recoverin (photoreceptors and cone bipolar cells, green), and DAPI (nuclei, blue in a and b). **(a)** overview (showing subretinal transplant with large rosette (Transplant #4, same transplant as in Figure 4). **(b)** enlargement. Arrowheads point to strongly labeled synaptophysin puncta in host IPL close to transplant processes (SC121). Transplant bones in rosettes are strongly labeled for synaptophysin. **(c)** Enlarged area of Transplant #5 (same as in Figure 5) showing area with parallel layers (good lamination). Scale bars = 50  $\mu\text{m}$
