# Supplementary material for: Retina Organoid Transplants Develop Photoreceptors and Improve Visual Function in RCS Rats With RPE Dysfunction
Source: PubMed Central journal article supplement (PMC7509771; doi:10.1167/iovs.61.11.34), 2020-09-18
Supplement: iovs-61-11-34_s003.pdf [file iovs-61-11-34_s003.pdf]

**SC121** (*human*) Synaptophysin  $\alpha$ -synuclein (*rat host IPL+AC*)

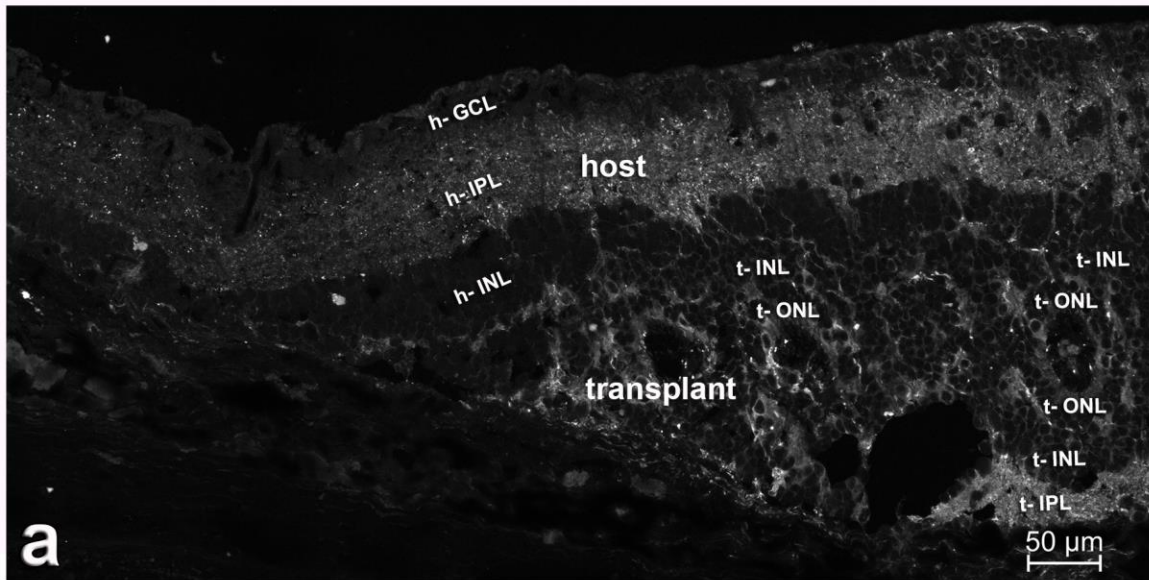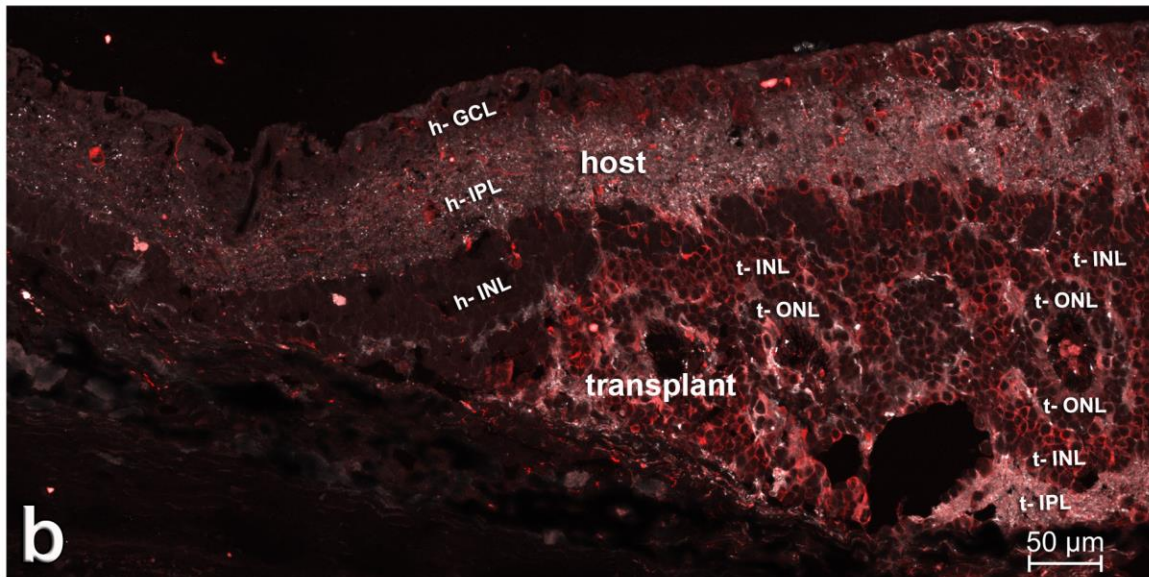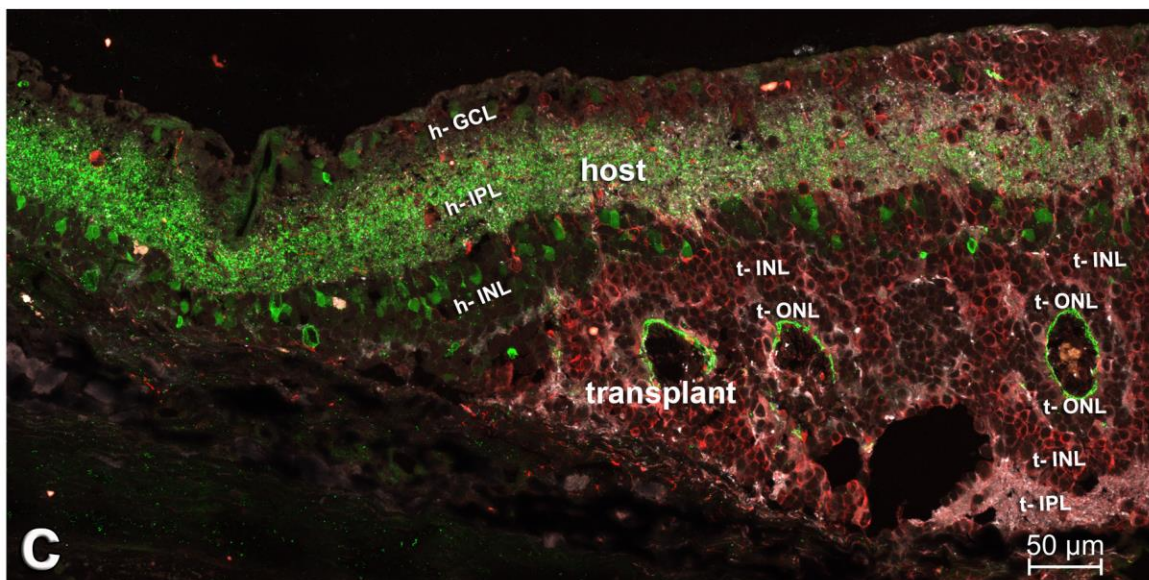

**Supplemental Figure S3 (refers to Figure 7): Synaptophysin in host over transplant versus outside**

Combination of synaptophysin (white), the human cytoplasmic marker SC-121 (red), and rodent-specific  $\alpha$ -synuclein (green). Confocal images of transplant #12 (see Table 3). **(a)** Synaptophysin alone. **(b)** Synaptophysin and SC-121. **(c)** Synaptophysin, SC-121 and rodent-specific  $\alpha$ -synuclein. Note that synaptophysin immunoreactivity in the host IPL is much stronger over the transplant than outside. Scale bars = 50 $\mu$ m.
